# Supplementary material for: Rapid prototyping of functional acoustic devices using laser manufacturing
Source: Royal Society of Chemistry journal article supplement (doi:10.1039/d2lc00725h), 2022-01-01
Supplement: d2lc00725h1.pdf [file d2lc00725h1.pdf]

## Electronic Supplementary Information (ESI)

### Rapid Prototyping of Functional Acoustic Devices Using Laser Manufacturing

Xiang Zhang,<sup>†a</sup> Rosa Son,<sup>†a</sup> Yen-Ju Lin,<sup>b</sup> Alexi Gill,<sup>a</sup> Shilin Chen,<sup>c,d</sup> Tong Qi,<sup>c,d</sup> David Choi,<sup>a</sup> Jing Wen,<sup>d</sup> Yunfeng Lu,<sup>c</sup> Neil Y.C. Lin<sup>a,e,f</sup> and Pei-Yu Chiou<sup>\*a</sup>

<sup>a</sup> Department of Mechanical and Aerospace Engineering, University of California at Los Angeles, USA.

<sup>b</sup> Department of Electrical and Computer Engineering, University of California at Los Angeles, USA.

<sup>c</sup> Department of Chemical and Biomolecular Engineering, University of California at Los Angeles, USA.

<sup>d</sup> Department of Microbiology, Immunology and Molecular Genetics, David Geffen School of Medicine, University of California at Los Angeles, USA.

<sup>e</sup> Department of Bioengineering, University of California at Los Angeles, USA.

<sup>f</sup> Institute for Quantitative and Computational Biosciences, University of California at Los Angeles, USA.

<sup>†</sup> These authors contribute equally

\* Corresponding authors

Email: [pychiou@g.ucla.edu](mailto:pychiou@g.ucla.edu)

#### **This ESI file includes:**

Captions for movies S1

#### **Other supplementary materials for this manuscript include the following:**

Movies S1

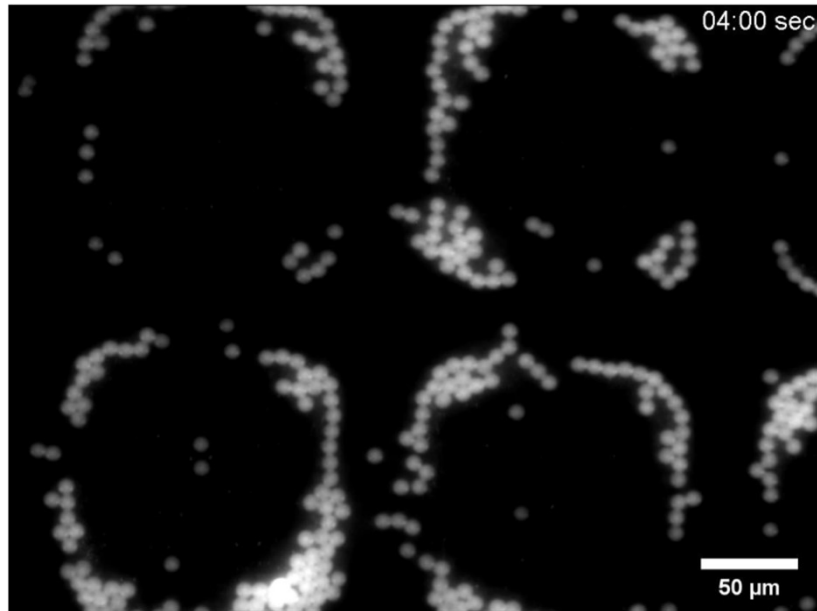

**Movie S1.** 10  $\mu\text{m}$  polystyrene beads in water are patterned using CNT-PDMS structure consisted of squared air cavities at the acoustic excitation of 3 MHz and 5  $V_{rms}$ .
